# Supplementary material
Source: PubMed Central journal article supplement (PMC6604263)
Supplement: ajn-0049-0497-s01.pdf [file ajn-0049-0497-s01.pdf]

#### Supplementary file 4A.

Influence analysis of prevalence of intradialytic hypotension defined according to the EBPG definition on session level (random effects model)

|                                            | Proportion | 95% confidence interval |
|--------------------------------------------|------------|-------------------------|
| Omitting Akhmouch, 2010                    | 12.0       | 6.9-20.2                |
| Omitting Flythe Hemocohort, 2014           | 10.3       | 4.7-21.2                |
| Omitting Kuipers, 2016                     | 11.2       | 6.0-20.0                |
| Omitting Rocha, 2015                       | 7.4        | 5.2-10.4                |
| Omitting Steinwandel, 2018                 | 10.3       | 0.06-0.19               |
| Pooled estimate (without omitting studies) | 0.10       | 5.5-18.6                |

#### Supplementary file 4B.

Influence analysis of prevalence of intradialytic hypotension defined according to the SBP nadir <90 mmHg definition on session level (random effects model)

|                                            | Proportion | 95% confidence interval |
|--------------------------------------------|------------|-------------------------|
| Omitting Cho, 2017                         | 0.12       | 0.12-0.12               |
| Omitting Flythe Hemocohort, 2014           | 0.12       | 0.12-0.12               |
| Omitting Flythe/ LDO, 2014                 | 0.16       | 0.16-0.16               |
| Omitting Orofino, 1990                     | 0.13       | 0.12-0.12               |
| Omitting Sands, 2014                       | 0.10       | 0.10-0.10               |
| Pooled estimate (without omitting studies) | 0.12       | 0.12-0.12               |
